# Supplementary material
Source: PubMed Central journal article supplement (PMC4663676)
Supplement: NIHMS65643-supplement-1.pdf [file NIHMS65643-supplement-1.pdf]

**Supplemental Material**

**Platelet P2Y<sub>12</sub> inhibitors reduce systemic inflammation and its prothrombotic effects in an experimental human model**

Mark R. Thomas<sup>1</sup>, Samuel N. Outteridge<sup>1</sup>, Ramzi A. Ajjan<sup>2</sup>, Fladia Phoenix<sup>2</sup>, Gurpreet K. Sangha<sup>1</sup>, Rachael E. Faulkner<sup>1</sup>, Rosemary Ecob<sup>1</sup>, Heather M. Judge<sup>1</sup>, Haroon Khan<sup>1</sup>, Laura E. West<sup>1</sup>, David H. Dockrell<sup>3</sup>, Ian Sabroe<sup>3</sup>, Robert F. Storey<sup>1</sup>

<sup>1</sup>Department of Cardiovascular Science, University of Sheffield, United Kingdom; <sup>2</sup>Leeds Institute of Cardiovascular and Metabolic Medicine, University of Leeds, United Kingdom; and <sup>3</sup>Department of Infection and Immunity, University of Sheffield, United Kingdom

## Supplemental Results

### **Residual Platelet P2Y<sub>12</sub> Reactivity Prior to LPS Correlates with Subsequent Peak Levels of TNF $\alpha$ and D-dimer**

TNF $\alpha$  was the first pro-inflammatory cytokine to increase, consistent with its central role in the pathophysiology of systemic inflammation and its prothrombotic effects. Each of the following indices of platelet reactivity to ADP pre-LPS correlated with subsequent peak levels of TNF $\alpha$  after LPS administration: platelet-monocyte aggregate formation ( $r=0.55$ ;  $p=0.002$ ; Fig III in the online supplement), final platelet aggregation ( $r=0.54$ ;  $p=0.002$ ) and platelet P-selectin expression ( $r=0.42$ ;  $p=0.023$ ). Peak levels of TNF $\alpha$  correlated with peak levels of D-dimer ( $r=0.60$ ;  $p<0.001$ ) and fibrin clot maximum absorbance ( $r=0.48$ ;  $p=0.01$ ).

**Supplemental Table****Table I Baseline and treatment characteristics**

|                                                      | Control<br>n=10        | Clopidogrel<br>n=10     | Ticagrelor<br>n=10    |
|------------------------------------------------------|------------------------|-------------------------|-----------------------|
| Age - median years<br>(interquartile range)          | 22.5 (21.0 –<br>24.25) | 21.0 (20.50 –<br>22.50) | 21.5 (20.0 –<br>22.0) |
| Male sex – no./total no.<br>(%)                      | 10/10 (100)            | 10/10 (100)             | 10/10 (100)           |
| Weight (kg) – mean<br>(SEM)                          | 76.4 (2.7)             | 75.0 (3.2)              | 74.2 (2.5)            |
| Body mass index (kg/m <sup>2</sup> )<br>– mean (SEM) | 23.0 (0.6)             | 22.7 (0.5)              | 23.2 (0.8)            |
| Race – no./total no.                                 |                        |                         |                       |
| White (%)                                            | 10/10 (100)            | 8/10 (80)               | 9/10 (90)             |
| Black (%)                                            | 0/10 (0)               | 1/10 (10)               | 0/10 (0)              |
| Asian (%)                                            | 0/10 (0)               | 1/10 (10)               | 1/10 (10)             |
| Duration of clopidogrel<br>treatment – days (SEM)    | 0 (0)                  | 7.1 (0.1)               | 0 (0)                 |
| Duration of ticagrelor<br>treatment – days (SEM)     | 0 (0)                  | 0 (0)                   | 6.7 (0.3)             |

**There were no significant differences in baseline characteristics between groups.**

**Table II Hemodynamic parameters before treatment, after treatment and 3 hours after LPS administration**

|                                      | Baseline | Before LPS | 3 Hours After LPS |
|--------------------------------------|----------|------------|-------------------|
| Heart rate (bpm)                     |          |            |                   |
| Control                              | 72±4     | 70±2       | 94±4*             |
| Clopidogrel                          | 70±5     | 68±4       | 94±4*             |
| Ticagrelor                           | 74±2     | 71±3       | 93±3*             |
| Mean arterial blood pressure (mm Hg) |          |            |                   |
| Control                              | 87±2     | 88±3       | 84±2              |
| Clopidogrel                          | 89±3     | 88±3       | 82±3              |
| Ticagrelor                           | 87±3     | 87±3       | 80±2              |
| Temperature °C                       |          |            |                   |
| Control                              | 36.1±0.1 | 35.9±0.1   | 37.9±0.2*         |
| Clopidogrel                          | 36.0±0.1 | 36.0±0.1   | 38.1±0.2*         |
| Ticagrelor                           | 36.0±0.1 | 36.0±0.1   | 37.7±0.2*         |

Data are mean ± SEM. \* = P<0.05 compared to value before LPS administration.

## Supplemental figures

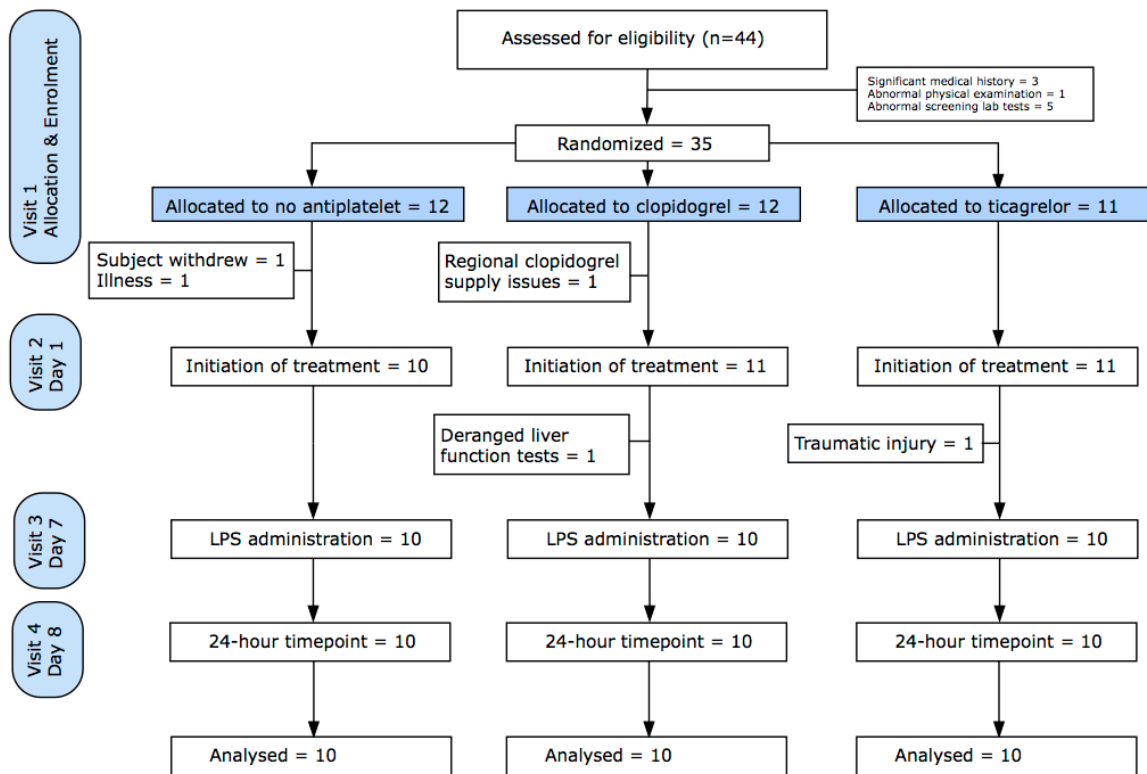

**Figure I. CONSORT flow diagram presenting the enrolment, intervention allocation, follow-up and data analysis with number of subjects for each group.**

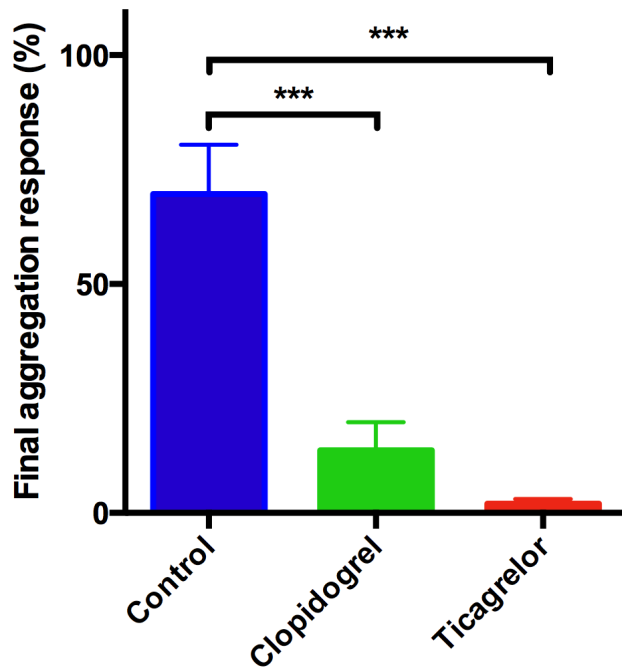

Figure II. Final platelet aggregation response measured after 1 week of ticagrelor, clopidogrel or control. Data expressed as mean  $\pm$ SEM (n=10 in each group). Effect of ticagrelor and clopidogrel compared to control using ANOVA.

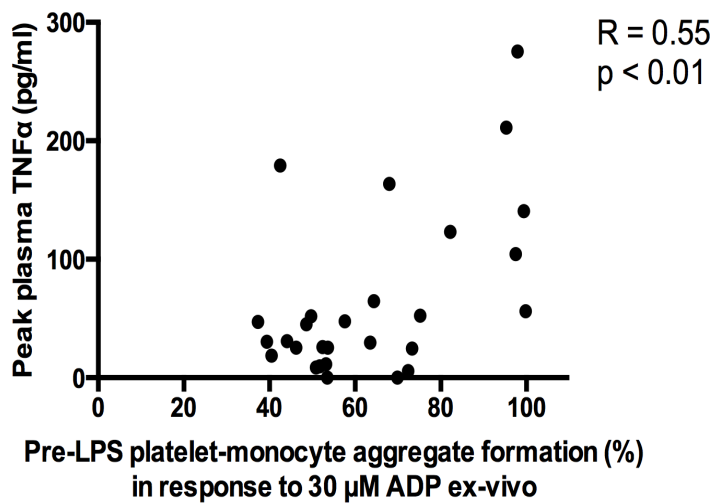

Figure III. Correlation between residual platelet reactivity after 1 week of randomized treatment (as demonstrated by ADP-induced platelet-monocyte aggregate formation) and subsequent TNF $\alpha$  response. Correlation determined by Pearson correlation coefficient.
